# Supplementary material for: Clinical and Genetic Characteristics of ABCC8 Nonneonatal Diabetes Mellitus: A Systematic Review
Source: Hindawi journal article supplement (doi:10.1155/2021/9479268), 2021-09-30
Supplement: f1 [file 9479268.f1.pdf]

## Supplementary Tables and Figures

**Supplement Table 1. The clinical and molecular genetic characteristics of the patients with *ABCC8*-NNDM in the previous studies**

| No. # | No. of the patient in the family | Variant         | Variant type | Age at diagnosis (ys) | BMI at diagnosis (kg/m <sup>2</sup> ) | Age at recruitment (ys) | BMI at recruitment (kg/m <sup>2</sup> ) | Treatment at recruitment | HbA1c at recruitment (%) | FPG at recruitment (mmol/l) | FINS at recruitment (uU/ml) |
|-------|----------------------------------|-----------------|--------------|-----------------------|---------------------------------------|-------------------------|-----------------------------------------|--------------------------|--------------------------|-----------------------------|-----------------------------|
| 1     | 1                                | p.N780S         | het          | 20*                   | /                                     | /                       | 20.3                                    | /                        | 6.4                      | 5.9                         | /                           |
| 2     | 1                                | p.G1008S        | het          | 25*                   | /                                     | /                       | 21.4                                    | /                        | 6.7                      | 5.8                         | /                           |
| 3     | 1                                | p.A1472T        | het          | 25*                   | /                                     | /                       | 22.8                                    | /                        | 5.0                      | 5.3                         | /                           |
| 4     | 1                                | p.E970V         | het          | 30*                   | /                                     | /                       | 27                                      | /                        | 5.1                      | 6.4                         | /                           |
| 5     | 1                                | p.K1022Q        | het          | 10*                   | /                                     | /                       | 20.4                                    | /                        | 14.1                     | 8.8                         | /                           |
| 6     | 1                                | p.G296R         | het          | /                     | /                                     | /                       | /                                       | /                        | /                        | /                           | /                           |
| 7     | 1                                | p.Y356C         | het          | /                     | /                                     | /                       | /                                       | /                        | /                        | /                           | /                           |
| 8     | 1                                | p.R825W         | het          | /                     | /                                     | /                       | /                                       | /                        | /                        | /                           | /                           |
| 9     | 1                                | p.R1379H        | het          | /                     | /                                     | /                       | /                                       | /                        | /                        | /                           | /                           |
| 10    | 1                                | p.E1506K        | het          | /                     | /                                     | /                       | /                                       | /                        | /                        | /                           | /                           |
| 11    | 1                                | p.R825Q         | het          | 6                     | /                                     | 19                      | 26                                      | Insulin                  | /                        | /                           | /                           |
| 12    | 1                                | p.R306Cs        | het          | /                     | /                                     | /                       | /                                       | OAD                      | /                        | /                           | /                           |
| 12    | 2                                | p.R306Cs        | het          | /                     | /                                     | /                       | /                                       | /                        | /                        | /                           | /                           |
| 13    | 1                                | p.E1506K        | het          | 28                    | /                                     | /                       | /                                       | /                        | /                        | 5.0                         | /                           |
| 14    | 1                                | p.H103Y, p.R74Q | het          | 9                     | /                                     | 17                      | 23.6                                    | OAD, insulin             | 11.0                     | 9.8                         | /                           |
| 15    | 1                                | p.R1493G        | het          | 30                    | /                                     | /                       | 30.3                                    | OAD                      | 6.0                      | /                           | /                           |
| 16    | 1                                | p.A1457T        | het          | 26                    | /                                     | 28                      | /                                       | OAD                      | /                        | /                           | /                           |
| 17    | 1                                | p.R1379H        | het          | 11                    | /                                     | 19                      | /                                       | OAD                      | /                        | /                           | /                           |
| 17    | 2                                | p.R1379H        | het          | /                     | /                                     | /                       | /                                       | /                        | /                        | /                           | /                           |
| 18    | 1                                | p.R1420H        | hom          | /                     | /                                     | /                       | /                                       | /                        | /                        | /                           | /                           |
| 19    | 1                                | p.R1418H        | hom          | 1.3                   | /                                     | /                       | /                                       | /                        | /                        | /                           | /                           |

|    |   |                         |                      |      |      |    |      |     |     |      |     |
|----|---|-------------------------|----------------------|------|------|----|------|-----|-----|------|-----|
| 19 | 2 | p.R1418H                | hom                  | 28   | 22.4 | 45 | /    | OAD | 8.1 | /    | /   |
| 19 | 3 | p.R1418H                | het                  | /    | /    | /  | 21.6 | /   | /   | /    | /   |
| 20 | 1 | p.R1379H                | het                  | 17   | 24   | 63 | /    | OAD | 7.3 | /    | /   |
| 21 | 1 | p.C435R                 | het                  | 15   | 20   | 39 | /    | OAD | 6.7 | /    | /   |
| 22 | 1 | p.L582V                 | het                  | 36   | 21   | 38 | /    | OAD | 6.2 | /    | /   |
| 22 | 2 | p.L582V                 | het                  | 32   | 37   | 37 | /    | OAD | 6.4 | /    | /   |
| 23 | 1 | p.Y356C                 | het                  | 39   | 26   | 74 | /    | OAD | 6.5 | /    | /   |
| 23 | 2 | p.Y356C                 | het                  | 35   | 20   | 35 | /    | /   | 5.5 | /    | /   |
| 24 | 1 | p.P201S                 | het                  | 53   | 22   | 80 | /    | OAD | 7.4 | /    | /   |
| 25 | 1 | p.C418R                 | het                  | 53   | 31   | 74 | /    | OAD | 6.2 | /    | /   |
| 26 | 1 | p.R620C                 | het                  | 46   | 25   | 56 | /    | OAD | 6.8 | /    | /   |
| 27 | 1 | p.R825W                 | het                  | 49   | 28   | 58 | /    | OAD | 6.2 | /    | /   |
| 28 | 1 | p.R1420H, p.F591fs604X  | Compo<br>und het     | 11   | 21.6 |    | /    | OAD | /   | /    | /   |
| 28 | 2 | p.R1420H                | het                  | /    | /    | /  | /    | /   | /   | /    | /   |
| 29 | 1 | p.A1366T                | het                  | 25   | 29.9 | 38 | /    | OAD | /   | /    | /   |
| 30 | 1 | p.R370S                 | het                  | 10.5 | 30.2 | /  | /    | /   | /   | 12.2 | /   |
| 31 | 1 | p.R933X, c-3992-9G>A    | Compo<br>und,<br>het | 22   | 26.1 | 31 | /    | /   | 7.1 | 6.1  | 8   |
| 32 | 1 | L1191LfsX1207, p.R1250X | het                  | 10   | 26.2 | 17 | /    | /   | 5.2 | 5.8  | 15  |
| 33 | 1 | p.L1147R, p.R1250X      | het                  | 16   | 22   | 24 | /    | /   | 5.0 | 5.1  | 9.3 |
| 34 | 1 | p.R1379H                | het                  | 19   | /    | 27 | 19.3 | OAD | 5.9 | /    | /   |
| 35 | 1 | p.R1379H                | het                  | 11   | /    | 19 | 18   | OAD | 9.5 | /    | /   |
| 36 | 1 | p.G214R, p.V222M        | het                  | 15   | /    | 20 | 27.3 | Ins | 8.5 | /    | /   |

|    |    |          |     |    |   |    |      |                    |     |   |   |
|----|----|----------|-----|----|---|----|------|--------------------|-----|---|---|
| 37 | 1  | p.N1244D | het | 14 | / | 37 | 30   | /                  | 9.9 | / | / |
| 38 | 1  | p.V1523L | het | 36 |   | 46 | 26.5 | OAD                | 6.5 | / | / |
| 39 | 1  | p.Q485R  | het | 13 | / | 19 | 26.6 | OAD                | 6.2 | / | / |
| 40 | 1  | p.E100K  | het | 42 | / | 46 | 25   | OAD and<br>insulin | 6.5 | / | / |
| 41 | 1  | p.E1506K | het | /  | / | /  | /    | /                  | /   | / | / |
| 41 | 2  | p.E1506K | het | /  | / | /  | /    | /                  | /   | / | / |
| 41 | 3  | p.E1506K | het | /  | / | /  | /    | /                  | /   | / | / |
| 41 | 4  | p.E1506K | het | /  | / | /  | /    | /                  | /   | / | / |
| 41 | 5  | p.E1506K | het | /  | / | /  | /    | /                  | /   | / | / |
| 41 | 6  | p.E1506K | het | /  | / | /  | /    | /                  | /   | / | / |
| 41 | 7  | p.E1506K | het | /  | / | /  | /    | /                  | /   | / | / |
| 41 | 8  | p.E1506K | het | /  | / | /  | /    | /                  | /   | / | / |
| 41 | 9  | p.E1506K | het | /  | / | /  | /    | /                  | /   | / | / |
| 41 | 10 | p.E1506K | het | /  | / | /  | /    | /                  | /   | / | / |
| 42 | 1  | p.A1536V | het | 29 | / | 30 | 26.2 | Dietary            | /   | / | / |
| 43 | 1  | p.G1478R | het | 30 | / | 44 | 33   | Insulin            | /   | / | / |
| 44 | 1  | p.Q1458E | het | 21 | / | 30 | 23   | Insulin            | /   | / | / |
| 45 | 1  | p.R1538Q | het | 47 | / | 72 | 23.7 | OAD                | /   | / | / |
| 45 | 2  | p.R1538Q | het | 39 | / | 40 | 42.2 | OAD                | /   | / | / |
| 46 | 1  | p.L1430F | het | 20 | / | 43 | 24.9 | Insulin            | /   | / | / |
| 47 | 1  | p.A1507P | het | 50 | / | 65 | 28.4 | Insulin            | /   | / | / |
| 47 | 2  | p.A1507P | het | 38 | / | 40 | 31.1 | OAD                | /   | / | / |

|    |   |          |     |    |      |    |      |                  |      |      |     |
|----|---|----------|-----|----|------|----|------|------------------|------|------|-----|
| 48 | 1 | p.A1390V | het | 39 | /    | /  | /    | OAD              | /    | /    | /   |
| 48 | 2 | p.A1390V | het | 20 | /    | /  | /    | Dietary          | /    | /    | /   |
| 48 | 3 | p.A1390V | het | 50 | /    | 56 | /    | OAD, insulin     | /    | /    | /   |
| 48 | 4 | p.A1390V | het | 38 | /    | /  | /    | Insulin          | /    | /    | /   |
| 49 | 1 | p.R306H  | het | 27 | 19   | /  | /    | OAD              | 7.2  | /    | /   |
| 49 | 2 | p.R306H  | het | 64 | /    | /  | /    | /                | /    | /    | /   |
| 50 | 1 | p.L171F  | hom | 27 | 17.8 | 13 | /    | OAD              | 12.1 | 14.2 | /   |
| 50 | 2 | p.L171F  | het | 30 | /    | 37 | /    | OAD, insulin     | 10.4 | 16.6 | /   |
| 50 | 3 | p.L171F  | het | 13 | /    | 40 | /    | Insulin          | /    | /    | /   |
| 51 | 1 | p.V607M  | het | /  | 22.9 | 37 | /    | Insulin          | 12.6 | 14.4 | /   |
| 51 | 2 | p.V607M  | het | 9  | 24.6 | 65 | /    | Insulin          | 12.0 | 16.7 | /   |
| 51 | 3 | p.V607M  | het | /  | 19.8 | 40 | /    | Insulin          | /    | /    | /   |
| 52 | 1 | p.V84I   | het | 32 | /    | 19 | 18.1 | /                | 5.9  | 6    | 8.4 |
| 52 | 2 | p.V84I   | het | 14 | /    | 19 | 17.8 | /                | 6.2  | 6.2  | /   |
| 52 | 3 | p.V84I   | het | 35 | /    | 15 | 20   | /                | 6.1  | 6.1  | /   |
| 52 | 4 | p.V84I   | het | 19 | /    | 41 | 24.3 | Dietary          | 5.9  | 6    | /   |
| 52 | 5 | p.V84I   | het | 12 | /    | 32 | 21   | Dietary          | 6.3  | 6.1  | /   |
| 52 | 6 | p.V84I   | het | 12 | /    | 59 | /    | /                | /    | 6.8  | /   |
| 53 | 1 | p.C435R  | het | 13 | /    | 38 | 21   | Insulin          | 6.2  | /    | /   |
| 54 | 1 | p.R1379H | het | 20 | /    | 64 | 27   | Insulin          | 7.4  | /    | /   |
| 54 | 2 | p.R1379H | het | 20 | /    | 63 | 27   | OAD, GLP1-<br>RA | 6.9  | /    | /   |
| 55 | 1 | p.R825W  | het | 18 | /    | 18 | 25.8 | OAD, insulin     | 12.3 | /    | /   |
| 55 | 2 | p.R825W  | het | 55 | /    | 68 | 22.9 | OAD              | 8.1  | /    | /   |
| 55 | 3 | p.R825W  | het | 51 | /    | 66 | 30   | OAD              | 7.8  | /    | /   |
| 55 | 4 | p.R825W  | het | 60 | /    | 72 | 22.8 | OAD              | 7    | /    | /   |

|    |   |                         |     |    |      |    |      |                    |      |      |   |
|----|---|-------------------------|-----|----|------|----|------|--------------------|------|------|---|
| 55 | 5 | p.R825W                 | het | /  | /    | 60 | /    | Insulin            | /    | /    | / |
| 55 | 6 | p.R825W                 | het | 27 | /    | 49 | 27.1 | Insulin            | 11.3 | /    | / |
| 56 | 1 | p.F793Sfs71+c-4608+4A>G | het | 32 | /    | 33 | 25.3 | Insulin            | 7.9  | 7.1  | / |
| 57 | 1 | p.A1536T                | het | 10 | /    | 33 | 25.3 | OAD                | 9.4  | 12.4 | / |
| 58 | 1 | p.F1067I                | het | 3  | /    | /  | /    | Insulin            | /    | 20.6 | / |
| 59 | 1 | p.R1379H                | het | /  | /    | /  | /    | /                  | /    | /    | / |
| 60 | 1 | p.M1513T                | het | 10 | /    | /  | /    | /                  | /    | 5.7  | / |
| 60 | 2 | p.M1513T                | het | /  | /    | /  | /    | OAD                | /    | /    | / |
| 61 | 1 | p.S1385F                | het | 33 | /    | /  | /    | /                  | /    | /    | / |
| 61 | 2 | p.S1385F                | het | /  | /    | /  | /    | /                  | /    | /    | / |
| 62 | 1 | p.E1205K                | het | 24 | /    | /  | /    | /                  | /    | /    | / |
| 62 | 2 | p.E1205K                | het | /  | /    | /  | /    | /                  | /    | /    | / |
| 63 | 1 | p.R1352H                | het | 18 | /    | /  | /    | /                  | /    | /    | / |
| 63 | 2 | p.R1352H                | het | /  | /    | /  | /    | /                  | /    | /    | / |
| 64 | 1 | p.A355T                 | het | /  | /    | /  | /    | /                  | /    | /    | / |
| 64 | 2 | p.A355T                 | Het | /  | /    | /  | /    | /                  | /    | /    | / |
| 65 | 1 | p.S53C                  | het | 30 | /    | 39 | /    | Diet               | /    | /    | / |
| 66 | 1 | p.A235T                 | het | 34 | /    | 53 | /    | Insulin            | /    | /    | / |
| 67 | 1 | p.V563D                 | het | 12 | /    | 50 | /    | Insulin            | /    | /    | / |
| 68 | 1 | p.G658V                 | het | 12 | /    | 43 | /    | Insulin            | /    | /    | / |
| 69 | 1 | p.D673N                 | het | 14 | /    | 27 | /    | OAD                | /    | /    | / |
| 70 | 1 | p.R825W                 | het | 21 | /    | 52 | /    | OAD                | /    | /    | / |
| 71 | 1 | p.L1147R                | het | 17 | /    | 51 | /    | Insulin            | /    | /    | / |
| 72 | 1 | p.K1384Q                | het | 30 | 18.6 | 45 | 20.8 | OAD and<br>insulin | 11.9 | 7.5  | / |
| 72 | 2 | p.K1384Q                | het | 12 | 20.1 | /  | /    | No                 | /    | /    | / |

|    |   |                    |     |    |      |    |      |                    |      |   |     |
|----|---|--------------------|-----|----|------|----|------|--------------------|------|---|-----|
| 72 | 3 | p.K1384Q           | het | 14 | 22.8 | /  | /    | No                 | /    | / | /   |
| 72 | 4 | p.K1384Q           | het | 55 | /    | /  | /    | No                 | /    | / | /   |
| 73 | 1 | p.G832S            | het | 42 | 30.3 | /  | /    | Diet               | 5.9  | / | /   |
| 73 | 2 | p.G832S            | het | 25 | 21.4 | /  | /    | OAD                | 5.9  | / | /   |
| 73 | 3 | p.G832S            | het | 50 | 23.5 | /  | /    | OAD                | 7.1  | / | /   |
| 73 | 4 | p.G832S            | het | 23 | 24.6 | /  | /    | OAD                | 6.6  | / | /   |
| 74 | 1 | p.Q833K            | het | 23 | 16.2 | /  | /    | OAD                | 5.3  | / | /   |
| 74 | 2 | p.Q833K            | het | 18 | 21.6 | /  | /    | OAD                | 7.4  | / | /   |
| 74 | 3 | p.Q833K            | het | 40 | 30.1 | /  | /    | Diet               | 6.5  | / | /   |
| 74 | 4 | p.Q833K            | het | 52 | 20.2 | /  | /    | OAD                | 4.9  | / | /   |
| 75 | 1 | p.E1506K           | het | 27 | 17.6 | /  | /    | Diet               | 6.5  | / | /   |
| 76 | 1 | p.E1506K           | het | 26 | /    | /  | /    | Ins                | 10.1 | / | /   |
| 77 | 1 | p.P1198L           | het | 27 | /    | 75 | 20.8 | OAD                | /    | / | 3.0 |
| 77 | 2 | p.P1198L           | het | 41 | /    | 41 | 22.8 | OAD                | 6.7  | / | 3.9 |
| 77 | 3 | p.P1198L           | het | 11 | /    | 18 | 27.1 | No                 | 6.6  | / | /   |
| 78 | 1 | p.R168C + p.R1420C | CH  | 15 | /    | 31 | 25.7 | OAD                | 6.7  | / | /   |
| 78 | 2 | p.R168C + p.R1420C | CH  | 18 | /    | 28 | 22.1 | OAD and<br>insulin | 7.8  | / | /   |
| 79 | 1 | p.H863R            | het | /  | /    | /  | /    | /                  | /    | / | /   |
| 80 | 1 | p.M1504T           | het | /  | /    | /  | /    | /                  | /    | / | /   |
| 81 | 1 | p.A269D            | het | /  | /    | /  | /    | /                  | /    | / | /   |
| 82 | 1 | p.R1182W           | het | /  | /    | /  | /    | /                  | /    | / | /   |
| 83 | 1 | p.R1182Q           | het | /  | /    | /  | /    | /                  | /    | / | /   |
| 84 | 1 | p.R1379H           | het | /  | /    | /  | /    | /                  | /    | / | /   |
| 85 | 1 | p.R1352H           | het | 17 | 22.7 | 17 | /    | OAD and<br>insulin | 6.7  | / | /   |

|    |   |          |     |   |   |    |   |   |   |   |   |
|----|---|----------|-----|---|---|----|---|---|---|---|---|
| 85 | 2 | p.R1352H | het | / | / | 45 | / | / | / | / | / |
| 86 | 1 | p.G1478R | het | / | / | /  | / | / | / | / | / |
| 87 | 1 | p.R825W  | het | / | / | /  | / | / | / | / | / |

# means the number of the family. \* If the age at the diagnosis of the patient was described with years in range, the higher limit of age was used. Abbreviations: *ABCC8*-NNDM, *ABCC8* variant-induced nonneonatal diabetes mellitus. BMI, body mass index; FPG, fasting plasma glucose; FINS, fasting insulin; OAD, oral anti-diabetic drugs; GLP1-RA, GLP1- receptor agonist.

**Supplement Table 2. The classification of the *ABCC8* variants causing nonneonatal diabetes mellitus in previous publications according to the the standards and guidelines recommended by American College of Medical Genetics (ACMG)**

| No. | Amino acid change | Evidence of pathogenicity | ACMG Classification    | The subtypes of <i>ABCC8</i> -NNDM |
|-----|-------------------|---------------------------|------------------------|------------------------------------|
| 1   | p.N780S           | PM1PM2PP3PP4              | likely pathogenic      | uncertain                          |
| 2   | p.G1008S          | PM1PM2PP3PP4              | likely pathogenic      | uncertain                          |
| 3   | p.A1472T          | PM1PM2                    | uncertain significance | uncertain                          |
| 4   | p.E970V           | PM1PM2PP3PP4              | likely pathogenic      | uncertain                          |
| 5   | p.K1022Q          | PM1PM2PP3PP4              | likely pathogenic      | uncertain                          |
| 6   | p.G296R           | PM1PM2PP3PP4              | likely pathogenic      | active                             |
| 7   | p.Y356C           | PS3PM1PM2PP1PP3PP4        | pathogenic             | active                             |
| 8   | p.R825W           | PS3PM1PM2PM5PP1PP3PP4     | pathogenic             | active                             |
| 9   | p.R1379H          | PM1PM2PM5PP3PP4           | likely pathogenic      | active                             |
| 10  | p.E1506K          | PS3PM1PM2PM5PP3PP4        | pathogenic             | inactive                           |
| 11  | p.R825Q           | PM1PM2PM5PP3PP4           | likely pathogenic      | uncertain                          |
| 12  | p.R306C           | PM1PM2PM5PP1PP3PP4        | likely pathogenic      | inactive                           |
| 13  | p.H103Y           | PM1PM2PP3PP4              | likely pathogenic      | uncertain                          |
| 14  | p.R74Q            | PM1PM2PP3PP4              | likely pathogenic      | inactive                           |
| 15  | p.R1493G          | PM1PM2PM5PP3PP4           | likely pathogenic      | uncertain                          |
| 16  | p.A1457T          | PM1PM2PP1PP3PP4PP5        | likely pathogenic      | inactive                           |
| 17  | p.R1420H          | PS3PM1PM2PM5PP3PP4        | pathogenic             | inactive                           |
| 18  | p.R1418H          | PS3PM1PM2PP1PP3PP4        | pathogenic             | inactive                           |
| 19  | p.P201S           | PM1PM2PP3PP4              | likely pathogenic      | uncertain                          |
| 20  | p.C418R           | PM1PM2PP3PP4              | likely pathogenic      | inactive                           |
| 21  | p.R620C           | PM1PP3                    | uncertain significance | inactive                           |
| 22  | p.C435R           | PM1PM2PP3PP4              | likely pathogenic      | active                             |
| 23  | p.L582V           | PS3PM1PM2PP1PP3PP4        | pathogenic             | active                             |



|    |                 |                    |                        |           |
|----|-----------------|--------------------|------------------------|-----------|
| 24 | p.F591fs604X    | PVS1PM2PM3PP4      | pathogenic             | inactive  |
| 25 | p.R370S         | PS3PM1PM2PP3PP4    | pathogenic             | active    |
| 26 | p.R933X         | PVS1PM2PM4PP3PP4   | pathogenic             | inactive  |
| 27 | p.L1191LfsX1207 | PVS1PM2PM4PP4      | pathogenic             | inactive  |
| 28 | p.R1250X        | PVS1PM2PM4PP3PP4   | pathogenic             | inactive  |
| 29 | p.L1147R        | PM1PM2PP3PP4       | likely pathogenic      | uncertain |
| 30 | p.G214R         | PM1PM2PP3PP4       | likely pathogenic      | active    |
| 31 | p.V222M         | PM1PM2PP3PP4       | likely pathogenic      | inactive  |
| 32 | p.N1244D        | PM1PM2PP3PP4       | likely pathogenic      | uncertain |
| 33 | p.V1523L        | PM1PM2PM5PP3PP4    | likely pathogenic      | active    |
| 34 | p.Q485R         | PM1PM2PP3PP4       | likely pathogenic      | active    |
| 35 | p.E100K         | PM1PM2PP4          | uncertain significance | active    |
| 36 | p.A1536V        | PM1PM2PM5PP1PP3PP4 | likely pathogenic      | uncertain |
| 37 | p.G1478R        | PM1PM2PM5PP1PP3PP4 | likely pathogenic      | inactive  |
| 38 | p.Q1458E        | PM1PM2PP1PP3PP4    | likely pathogenic      | uncertain |
| 39 | p.R1538Q        | PM1PM2PP1PP3PP4    | likely pathogenic      | inactive  |
| 40 | p.L1430F        | PM1PM2PP1PP3PP4    | likely pathogenic      | uncertain |
| 41 | p.A1507P        | PM1PM2PP1PP3PP4    | likely pathogenic      | inactive  |
| 42 | p.A1390V        | PM1PM2PP1PP3PP4    | likely pathogenic      | uncertain |
| 43 | p.R306H         | PM1PM2PM5PP1PP3PP4 | likely pathogenic      | active    |
| 44 | p.L171F         | PM1PM2PM5PP1PP3PP4 | likely pathogenic      | uncertain |
| 45 | p.V607M         | PM1PM2PP1PP3PP4    | likely pathogenic      | active    |
| 46 | p.V84I          | PM1PM2PP1PP3PP4    | likely pathogenic      | uncertain |
| 47 | p.F793Sfs71     | PVS1PM2PM4PP4      | pathogenic             | inactive  |
| 48 | p.A1536T        | PM1PM2PM5PP3PP4    | likely pathogenic      | uncertain |
| 49 | p.A1366T        | PM2PP3PP4          | uncertain significance | uncertain |

|    |          |                       |                        |           |
|----|----------|-----------------------|------------------------|-----------|
| 50 | p.F1067I | PM1PM2PP3PP4          | likely pathogenic      | active    |
| 51 | p.M1513T | PM1PMPM5PP3PP4        | likely pathogenic      | uncertain |
| 52 | p.S1385F | PM1PM2PP3PP4          | likely pathogenic      | uncertain |
| 53 | p.E1205K | PM1PM2PP3PP4          | likely pathogenic      | uncertain |
| 54 | p.R1352H | PM2PP3PP4             | uncertain significance | inactive  |
| 55 | p.A355T  | PM1PM2                | uncertain significance | inactive  |
| 56 | p.S53C   | PM1PM2PP3PP4          | likely pathogenic      | uncertain |
| 57 | p.A235T  | PM1PM2                | uncertain significance | uncertain |
| 58 | p.V563D  | PM1PM2PP3PP4          | likely pathogenic      | uncertain |
| 59 | p.G658V  | PM1PM2PP4             | uncertain significance | uncertain |
| 60 | p.D673N  | PM1PM2PP4             | uncertain significance | uncertain |
| 61 | p.K1384Q | PM1PM2PM5PP1PP3PP4    | likely pathogenic      | inactive  |
| 62 | p.G832S  | PM1PM2PM5PP1PP3PP4    | likely pathogenic      | uncertain |
| 63 | p.Q833K  | PM1PM2PP1PP3PP4       | likely pathogenic      | uncertain |
| 64 | p.P1198L | PS3PM1PM2PP1PP3PP4    | pathogenic             | active    |
| 65 | p.R168C  | PM1PM2PP1PP3PP4       | likely pathogenic      | inactive  |
| 66 | p.R1420C | PM1PM2PM5PP1PP3PP4    | likely pathogenic      | inactive  |
| 67 | p.H862R  | PM1PM2PM5PP1PP3       | likely pathogenic      | uncertain |
| 68 | p.M1504T | PM1PM2PP3PP4          | likely pathogenic      | uncertain |
| 69 | p.A269D  | PM1PM2PP3PP4          | likely pathogenic      | active    |
| 70 | p.R1182W | PS3PM1PM2PM5PP3PP4    | pathogenic             | active    |
| 71 | p.R1182Q | PS3PM1PM2PM5PP1PP3PP4 | pathogenic             | active    |

Abbreviations: *ABCC8*-NNDM, indicates *ABCC8* variant-induced nonneonatal diabetes mellitus. PM, pathogenic moderate; PP, pathogenic supporting; PS, pathogenic strong; PVS, pathogenic very strong.

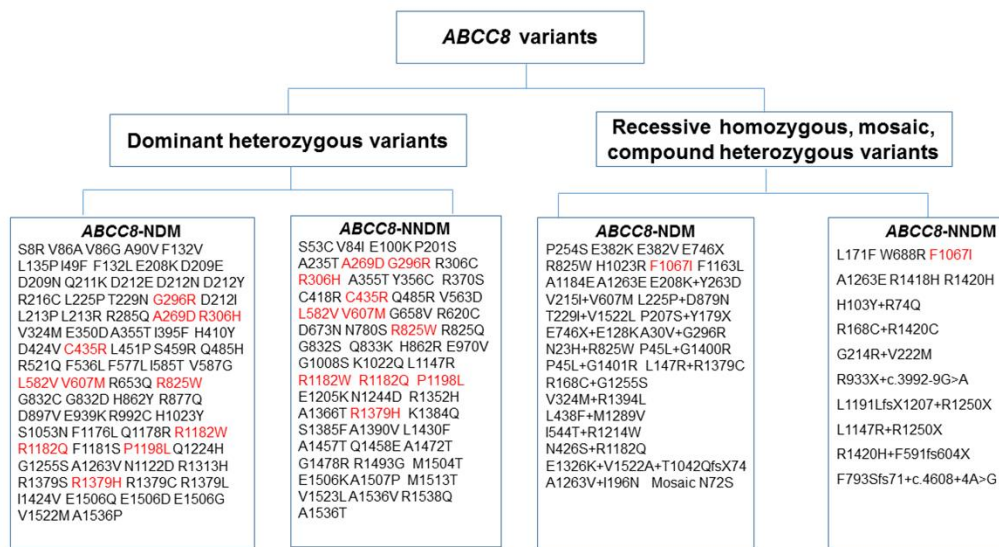

**Supplement Figure 1. A diagram illustrates the inheritance of *ABCC8* variants in probands with neonatal diabetes mellitus and nonneonatal diabetes mellitus. Variants showed in red represent the variants were identified both in neonatal diabetes mellitus and nonneonatal diabetes mellitus. Abbreviations: *ABCC8*-NDM, *ABCC8* variant-induced neonatal diabetes mellitus; *ABCC8*-NNDM, *ABCC8* variant-induced nonneonatal diabetes mellitus.**
